# Supplementary material
Source: ML conference proceedings conference paper supplement (https://proceedings.neurips.cc/paper_files/paper/2008/hash/e555ebe0ce426f7f9b2bef0706315e0c-Abstract.html)
Supplement: Supplementary file [file e555ebe0ce426f7f9b2bef0706315e0c-Supplemental.zip]

# Supplementary Material for the paper: “Non-parametric Regression between manifolds”

Florian Steinke<sup>1</sup>, Matthias Hein<sup>2</sup>

<sup>1</sup> Max Planck Institute for Biological Cybernetics, 72076 Tübingen, Germany

<sup>2</sup> Saarland University, 66041 Saarbrücken, Germany  
steinke@tuebingen.mpg.de, hein@cs.uni-sb.de

November 4, 2008

## 1 Second order approximation of a submanifold in Euclidean space

Given an  $m$ -dimensional submanifold  $M$  isometrically embedded in  $\mathbb{R}^s$ , we want to approximate  $M$  up to second-order around a given point  $p \in M$ .

**Proposition 1** *Let  $x^1, \dots, x^m$  be the coordinates associated with an orthonormal basis of the tangent space at  $T_p M$ . Then in Cartesian coordinates  $z$  of  $\mathbb{R}^s$ , the manifold can be approximated up to second order as*

$$z(x) = (x^1, \dots, x^m, f^{m+1}(x), \dots, f^s(x)),$$

where  $f^i(x) = \sum_{\alpha, \beta=1}^m \Pi_{\alpha\beta}^i x^\alpha x^\beta$  and  $\Pi_{\alpha\beta}^i$  is the second fundamental form of  $M$  at  $p$ . If  $M$  is a hypersurface, then we have  $z(x) = (x^1, \dots, x^{s-1}, f^s(x))$ , and  $f^s$  is given as

$$f^s(x) = \sum_{i=1}^{s-1} \kappa_i (x^i)^2,$$

if the coordinates  $x^\alpha$  are aligned with the principal directions and  $\kappa_i$  are the principal curvatures of  $M$  at  $p$ .

**Proof:** Let  $\gamma(t)$  be a geodesic on  $M$  with  $\gamma(0) = p$ . Then we can do a Taylor expansion of  $\gamma$  around  $p$  with respect to the ambient space  $\mathbb{R}^s$ ,

$$\gamma(t) = \gamma(0) + \gamma'(0)t + \frac{1}{2}\gamma''(0)t^2 + O(t^3).$$

We have  $\gamma'(0) \in T_p M$  and, since  $M$  is isometrically embedded,  $\|\gamma'(0)\|_{T_p M} = \|\gamma'(0)\|_{T_p \mathbb{R}^s} = \|\gamma'(0)\|_{\mathbb{R}^s}$ .

That means parametrization by arclength is the same in  $M$  and  $\mathbb{R}^s$ . Now if  $\gamma(t)$  is parameterized by arclength which is equivalent to  $\|\gamma'(t)\|_{\mathbb{R}^s} = 1$ , then we have

$$0 = \frac{\partial}{\partial t} \|\gamma'(t)\|_{\mathbb{R}^s}^2 = 2 \langle \gamma''(t), \gamma'(t) \rangle_{\mathbb{R}^s}.$$

However, we even know by the relation between extrinsic and intrinsic derivative, see [1, p. 140], that

$$\gamma'' = D_t \gamma' + \Pi(\gamma', \gamma'),$$

where  $\Pi : T_p M \times T_p M \rightarrow N_p M$  is the second fundamental form or extrinsic curvature of  $M$ ,  $N_p M$  is the normal space of  $M$  (the subspace orthogonal to the tangent space  $T_p M$  in  $\mathbb{R}^s$ ) and  $D_t \gamma' = {}^M \nabla_{\gamma'} \gamma'$ . Since  $\gamma$  is a geodesic, we have  $D_t \gamma' = 0$  (the intrinsic acceleration is zero) and get

$$\gamma'' = \Pi(\gamma', \gamma').$$

Note, that  $\gamma'' \in N_p M$ . Plugging this into the Taylor expansion of the geodesic, we obtain

$$\gamma(t) = \gamma(0) + \gamma'(0)t + \frac{t^2}{2} \Pi(\gamma', \gamma') + O(t^3),$$

where  $\gamma'(0) \in T_p M$  and  $\Pi(\gamma', \gamma') \in N_p M$ . We deduce that, if we introduce orthonormal coordinates  $x^i$  for the subspace  $p + T_p M$  with origin at  $p \in M$  and extend this to a full Cartesian coordinate system of  $\mathbb{R}^s$ , we get the local second order approximation of  $M$  as

$$(x^1, \dots, x^m, f^{m+1}(x), \dots, f^s(x)),$$

where  $f^i(x) = \sum_{\alpha, \beta=1}^m \Pi_{\alpha\beta}^i x^\alpha x^\beta$  and  $\Pi_{\alpha\beta}^i$  is the second fundamental form described in the local coordinate system (note that  $\Pi_{\alpha\beta}^i = 0$  if  $i \leq m$  since  $\Pi(\frac{\partial}{\partial x^\alpha}, \frac{\partial}{\partial x^\beta}) \in N_p M$ ).

For a hypersurface  $M$  the normal space  $N_p M$  is one-dimensional,  $\Pi(X, Y) = h(X, Y)N$ , where  $N$  is the normal vector at  $p$  and  $h : T_p M \times T_p M \rightarrow \mathbb{R}$ . Thus in coordinates  $h$  is just a  $(s-1) \times (s-1)$ -symmetric matrix with eigenvalues  $\kappa_i$ ,  $i = 1, \dots, s-1$  and thus in the basis formed by the eigenvectors we get

$$h(X, Y) = \sum_{\alpha=1}^{s-1} \kappa_\alpha X^\alpha Y^\alpha,$$

and thus we get the second-order approximation  $(x^1, \dots, x^{s-1}, f^s(x))$  with  $f^s(x) = \sum_{\alpha=1}^{s-1} \kappa_\alpha x^\alpha x^\alpha$ .  $\square$

## 2 Representation of the second derivative of $\Psi$ using the second-order approximation of the input manifold

As above, assume that  $M$  is an  $m$ -dimensional submanifold in  $\mathbb{R}^s$ .

**Proposition 2** *Using a second-order approximation of  $M$  centered at  $p \in M$ , we get in Cartesian coordinates  $z = (x^1, \dots, x^m, f^{m+1}(x), \dots, f^s(x))$  that*

$$g_{\alpha\beta}(0) = \delta_{\alpha\beta}, \quad {}^M\Gamma_{\beta\gamma}^\alpha(0) = 0.$$

Furthermore, we have at  $p \in M$ ,

$$\left[ \frac{\partial^2 \Psi^\mu}{\partial x^\beta \partial x^\alpha} - \frac{\partial \Psi^\mu}{\partial x^\gamma} {}^M\Gamma_{\beta\alpha}^\gamma \right] = \left[ \frac{\partial^2 \Psi^\mu}{\partial z^\beta \partial z^\alpha} + \sum_{r=m+1}^s \frac{\partial \Psi^\mu}{\partial z^r} \Pi_{\beta\alpha}^r \right].$$

**Proof:** The function  $i : \mathbb{R}^m \rightarrow \mathbb{R}^s$  defined as

$$(x^1, \dots, x^m) \mapsto i(x) = (x^1, \dots, x^m, f^{m+1}(x), \dots, f^s(x)),$$

can be seen as the embedding of the second order approximation of  $M$  into  $\mathbb{R}^s$ . The induced metric is given as

$$g_{\alpha\beta} = \sum_{r=1}^s \frac{\partial i^r}{\partial x^\alpha} \frac{\partial i^r}{\partial x^\beta} = \begin{cases} 1 + \sum_{k=m+1}^s \left( \frac{\partial f^k}{\partial x^\alpha} \right)^2, & \text{if } \alpha = \beta, \\ \sum_{k=m+1}^s \frac{\partial f^k}{\partial x^\alpha} \frac{\partial f^k}{\partial x^\beta}, & \text{if } \alpha \neq \beta. \end{cases}$$

Since the functions  $f^k$  are all quadratic in the coordinates  $x^\alpha$ , we immediately see that  $g_{\alpha\beta}(0) = \delta_{\alpha\beta}$ . Moreover, we have

$$\frac{\partial g_{\alpha\beta}}{\partial x^\gamma} = \begin{cases} 2 \sum_{k=m+1}^s \frac{\partial^2 f^k}{\partial x^\gamma \partial x^\alpha} \frac{\partial f^k}{\partial x^\beta}, & \text{if } \alpha = \beta, \\ \sum_{k=m+1}^s \left( \frac{\partial^2 f^k}{\partial x^\gamma \partial x^\alpha} \frac{\partial f^k}{\partial x^\beta} + \frac{\partial f^k}{\partial x^\alpha} \frac{\partial^2 f^k}{\partial x^\gamma \partial x^\beta} \right), & \text{if } \alpha \neq \beta. \end{cases}$$

Again, since  $f^i$  are quadratic functions in  $x^\alpha$  we have  $\frac{\partial g_{\alpha\beta}}{\partial x^\gamma} = 0$  at the origin. Now, the Christoffel symbols in local coordinates  $x^\alpha$  are given as [1, p. 70]

$$\Gamma_{\alpha\beta}^\gamma = \frac{1}{2} g^{\gamma\rho} (\partial_\alpha g_{\beta\rho} + \partial_\beta g_{\alpha\rho} - \partial_\rho g_{\alpha\beta}),$$

and with the previous result, we also obtain  $\Gamma_{\alpha\beta}^\gamma = 0$  at the origin. Moreover, we have

$$\frac{\partial^2 \Psi^\mu}{\partial x^\beta \partial x^\alpha} = \frac{\partial^2 \Psi^\mu}{\partial z^r \partial z^u} \frac{\partial z^r}{\partial x^\alpha} \frac{\partial z^u}{\partial x^\beta} + \frac{\partial \Psi^\mu}{\partial z^r} \frac{\partial^2 z^r}{\partial x^\alpha \partial x^\beta},$$

and

$$\begin{aligned} \frac{\partial z^r}{\partial x^\alpha} &= \begin{cases} 1, & \text{if } r = \alpha, \\ 0, & \text{if } r \leq m \text{ and } r \neq \alpha, \\ \frac{\partial f^r}{\partial x^\alpha}, & \text{if } r > m, \end{cases} \\ \frac{\partial^2 z^r}{\partial x^\beta \partial x^\alpha} &= \begin{cases} 0, & \text{if } r \leq m, \\ \Pi_{\alpha\beta}^r, & \text{if } r > m, \end{cases} \end{aligned}$$

and thus, we obtain at  $x = 0$ ,

$$\begin{aligned}\frac{\partial^2 \Psi^\mu}{\partial x^\beta \partial x^\alpha} &= \frac{\partial^2 \Psi^\mu}{\partial z^r \partial z^u} \frac{\partial z^r}{\partial x^\alpha} \frac{\partial z^u}{\partial x^\beta} + \frac{\partial \Psi^\mu}{\partial z^r} \frac{\partial^2 z^r}{\partial x^\alpha \partial x^\beta} \\ &= \frac{\partial^2 \Psi^\mu}{\partial z^\beta \partial z^\alpha} + \sum_{r=m+1}^s \frac{\partial \Psi^\mu}{\partial z^r} \Pi_{\beta\alpha}^r.\end{aligned}$$

For a hypersurface  $M$  we have  $\Pi_{\beta\alpha}^r = N^r h_{\beta\alpha}$ , where  $h$  is the so called shape operator. If the coordinates  $x^\alpha$  are aligned with the principal directions (the eigenvectors of  $h_{\beta\alpha}$ ), we get  $\Pi_{\beta\alpha}^r = 0$  if  $r < s$  and  $\Pi_{\beta\alpha}^s = \kappa_\alpha \delta_{\alpha\beta}$ .  $\square$

## References

- [1] J. M. Lee. *Riemannian Manifolds - An introduction to curvature*. Springer, New York, 1997.
